# Supplementary material
Source: HighWire-hosted journal article supplement (https://cebp.aacrjournals.org/content/suppl/2008/11/05/1055-9965.EPI-07-2893)
Supplement: supplemental_table_2_legend_2893.pdf [file supplemental_table_2_legend_2893.pdf]

Supplemental Table 2. Probe sets (n=67) potentially involved in the development of oral dysplasia (See separate attachment “CHEN Supplemental Table 2”)
